# Supplementary material
Source: PubMed Central journal article supplement (PMC4256774)
Supplement: 0febb470866d72d96a5eadb712c66f84_genetics.114.167320-9.pdf [file 0febb470866d72d96a5eadb712c66f84_genetics.114.167320-9.pdf]

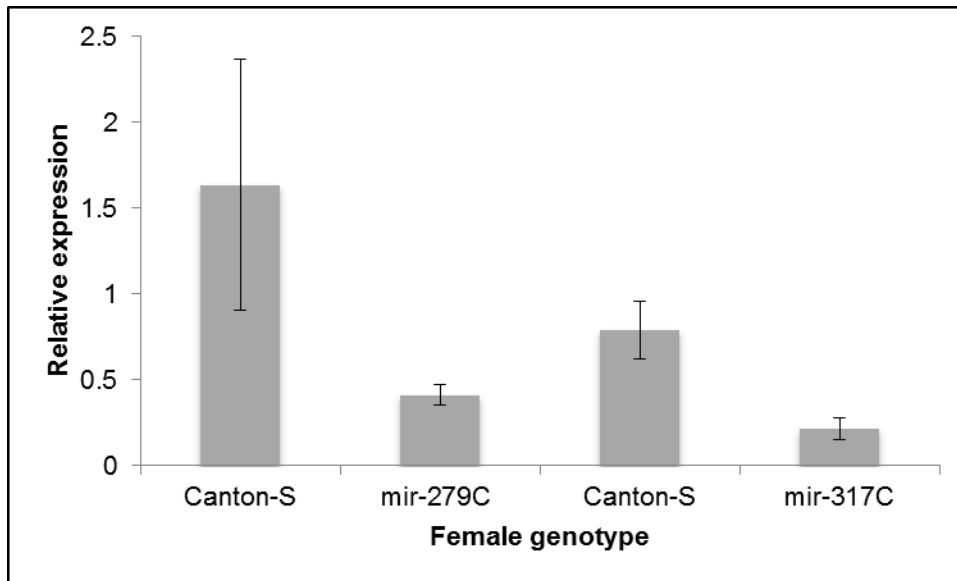

**Figure S5** Mean  $\pm$  SE relative expression of *mir-279* and *mir-317* in the control *w<sup>1118</sup>*, Canton-S and the *mir-279C* and *mir-317C* hypomorph lines. The miRNA hypomorphs had significantly lower expression than the control line. We assayed the Canton-S line twice so that the qRT-PCR run for each miRNA mutant line was conducted in parallel to the control line. The miRNA hypomorph lines had significantly lower expression than their controls (Wilcoxon rank sum,  $W = 31$ ,  $P = 0.041$  for *mir-279* and  $W = 33$ ,  $P = 0.015$  for *mir-317*). The standard curves for the miRNA qPCR probes ran from 0.5-0.00016 ng total RNA with a 1:5 serial dilution and had the following  $R^2$  and slope values: *miR-279*:  $R^2 = 0.9866$ , slope = -2.6378; *mir-317*:  $R^2 = 0.9828$ , slope = -2.4508; *mir-2S*:  $R^2 = 0.9942$ , slope = -3.2352.
