# Supplementary material
Source: PubMed Central journal article supplement (PMC4256774)
Supplement: 3c55ae175a2a43c30c94067b98ebf9d2_genetics.114.167320-2.pdf [file 3c55ae175a2a43c30c94067b98ebf9d2_genetics.114.167320-2.pdf]

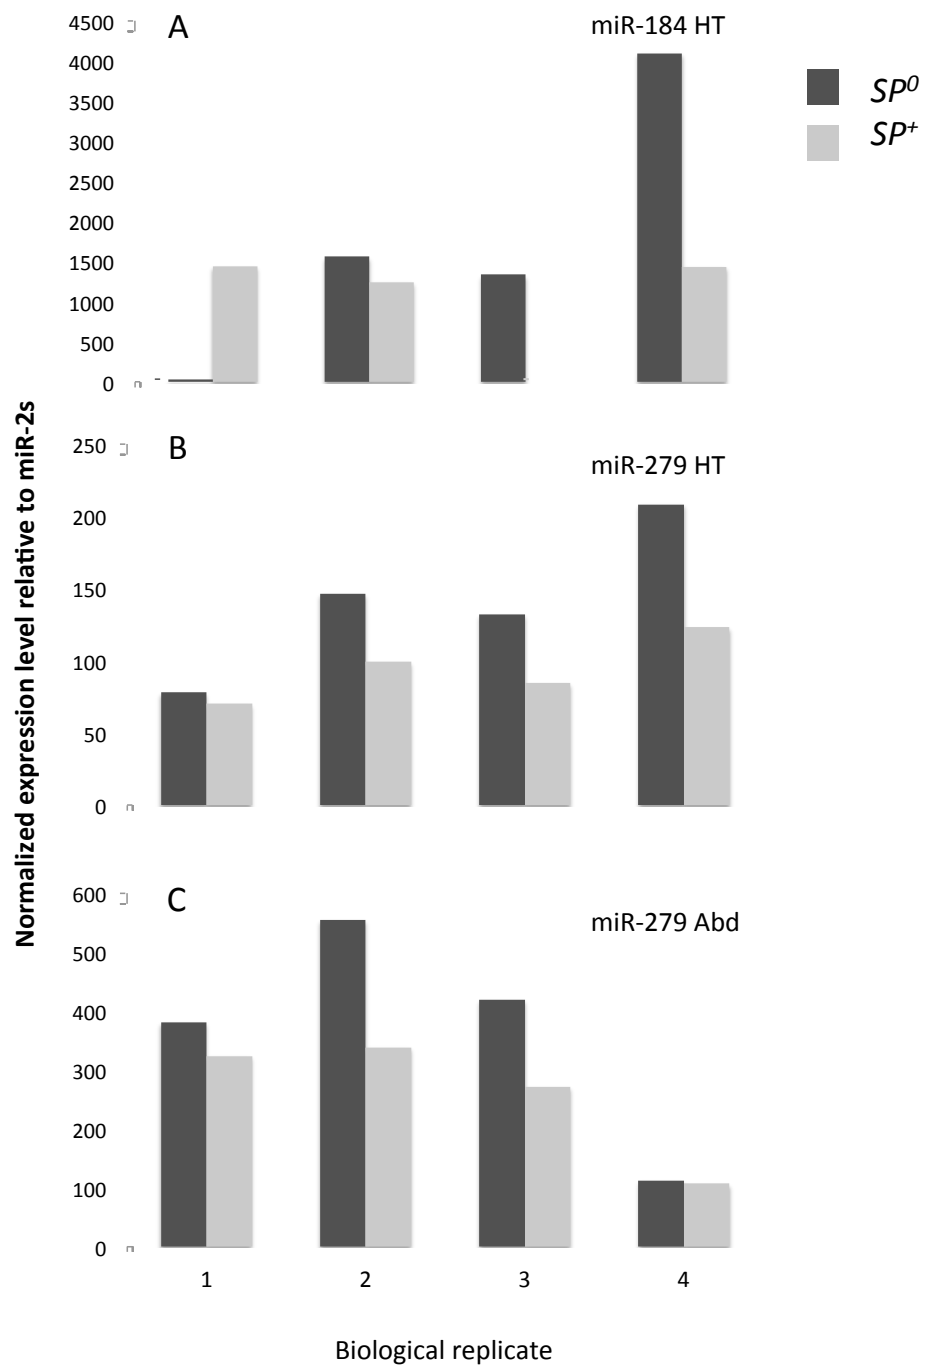

**Figure S2** qRT-PCR validation of expression level changes in microRNAs following receipt of SP, for two of the miRNA loci investigated in this study. Shown are the normalized expression levels 3hr following SP receipt, for (A) miR-184 in the HT, (B) miR-279 in the HT, and (C) miR-279 in the Abd. Normalized expression, relative to miR-2s, derived from qRT-PCR is shown for 4 replicates of females mated to  $SP^0$  or  $SP^+$  males. Individual replicate data are shown to illustrate the consistent down regulation of miR-184 and miR-279 in response to SP receipt, regardless of overall miRNA expression level variation. The small RNA sequencing described in Supporting Information 1 was conducted on 2 each of the above replicate samples (replicates 3 and 4 (HT); 2 and 4 (Abd), respectively). The qRT-PCR results validated the down regulation of miR-184 (in 3/4 replicates) and miR-279 (in 8/8 replicates) observed in the small RNA sequencing data.
