# Supplementary material
Source: PubMed Central journal article supplement (PMC4256774)
Supplement: 14361e3d3a9f0bf9dbc3c0eddbfb43ae_genetics.114.167320-6.pdf [file 14361e3d3a9f0bf9dbc3c0eddbfb43ae_genetics.114.167320-6.pdf]

**A**

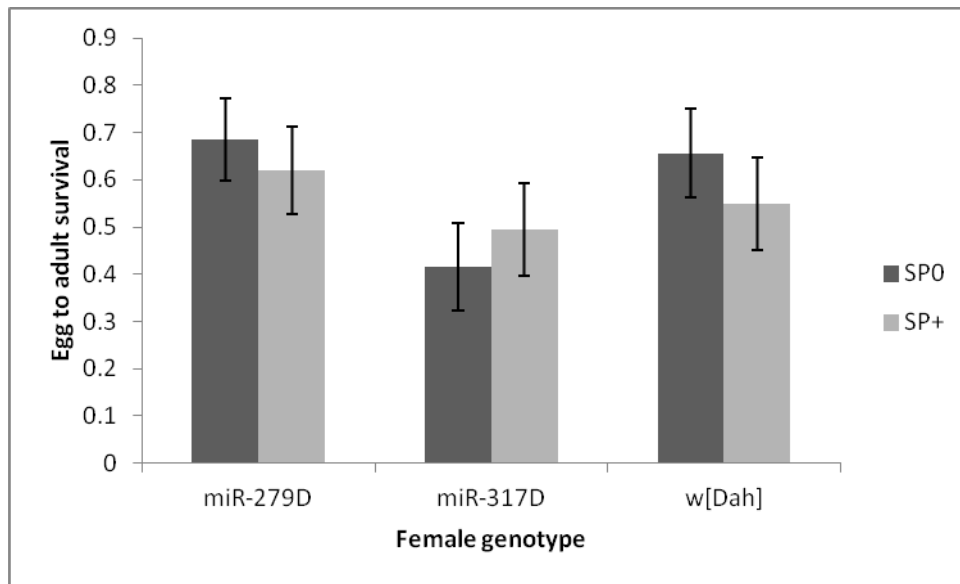

**B**

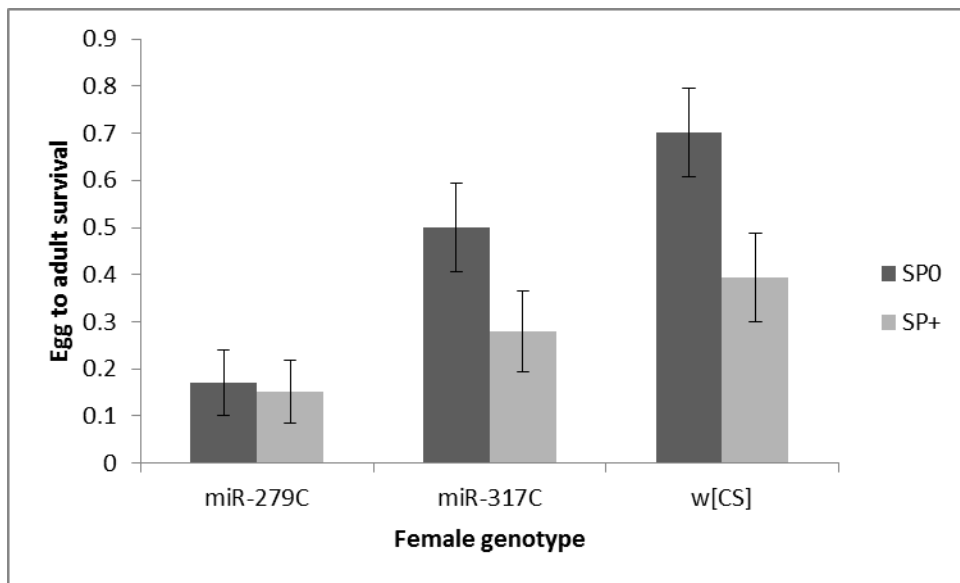

**C**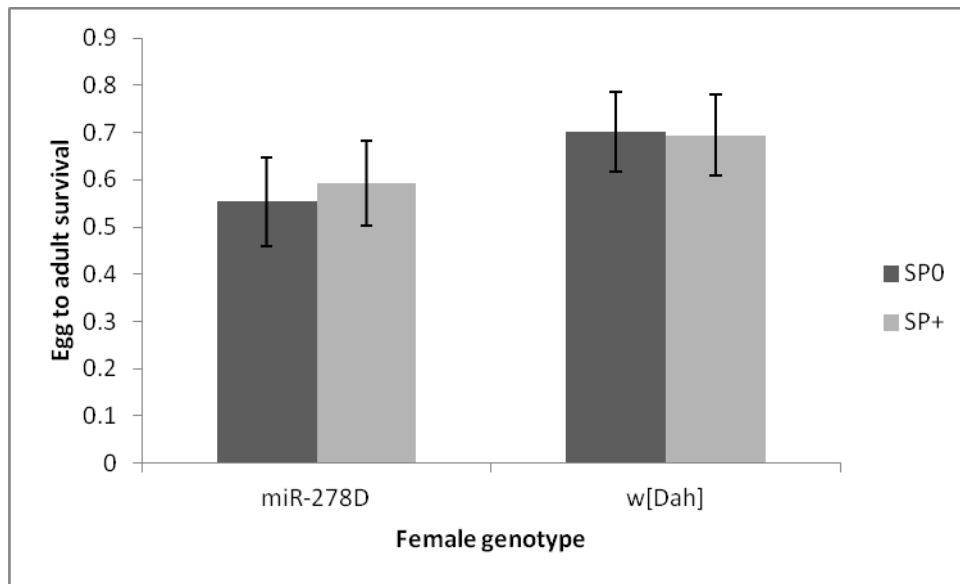**D**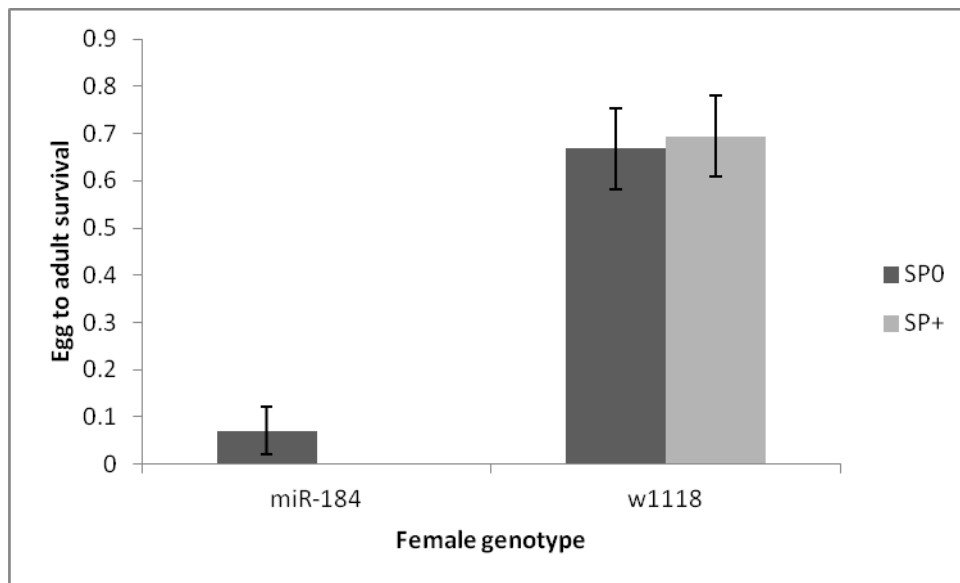

**Figure S3** Egg-to adult survival (mean  $\pm$  SE) for the miRNA-lacking females in the 24 hr intermating interval following a single mating to either a SP-lacking ( $SP^0$ ) or a control male ( $SP^+$ ): (A) hypomorphic *mir-279D* and *mir-317D* females backcrossed into the wild-type  $w^{[Dah]}$  genetic background, (B) hypomorphic *mir-279C* and *mir-317C* females backcrossed into  $w^{[CS]}$ , (C) *mir-278D* knock out females in  $w^{[Dah]}$  and (D) *mir-184* knock out females in the  $w^{1118}$  background.
