# Supplementary material
Source: PubMed Central journal article supplement (PMC4256774)
Supplement: 52667b85bfcc4e1ab0c7ea4f465eccc8_genetics.114.167320-4.pdf [file 52667b85bfcc4e1ab0c7ea4f465eccc8_genetics.114.167320-4.pdf]

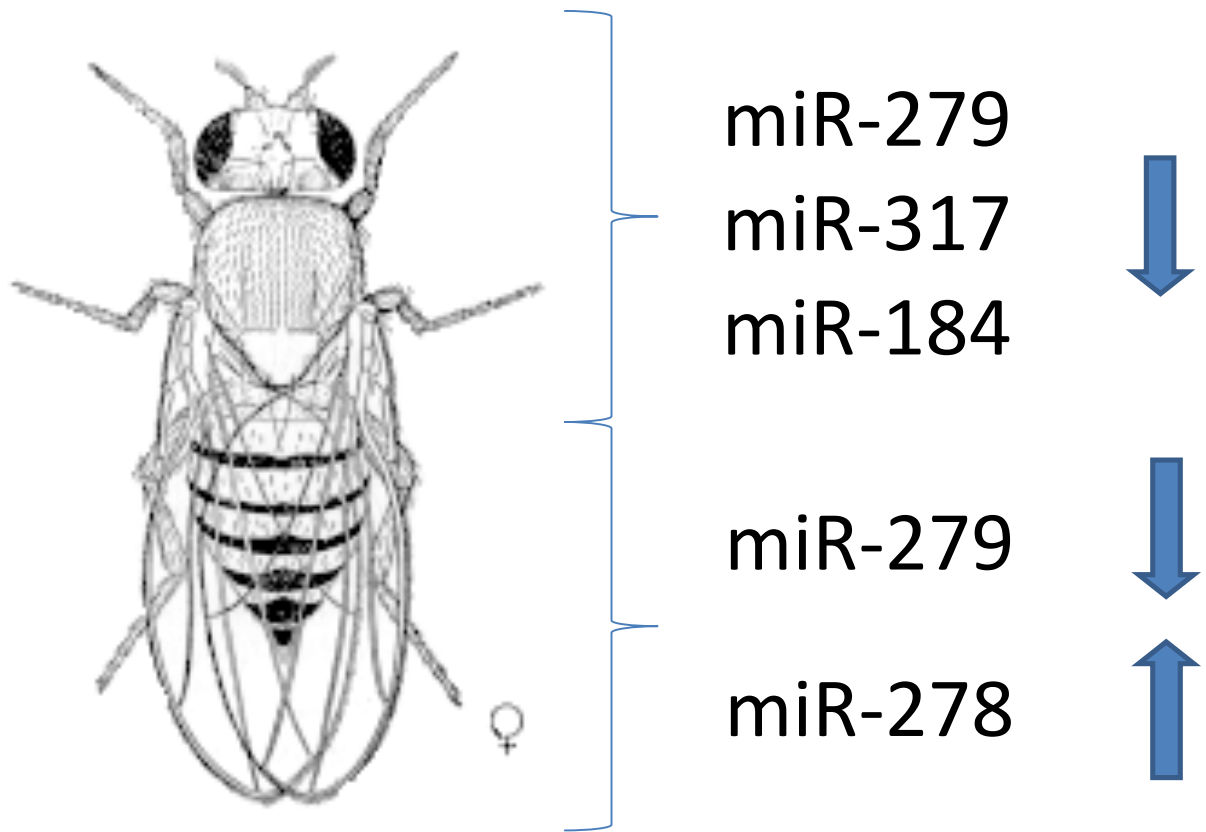

**Figure S1** Summary scheme of the direction of expression change in the four selected microRNAs in female Head+Thorax and Abdomen samples 3 hr following receipt of sex peptide from males during mating.
