# Supplementary material
Source: PubMed Central journal article supplement (PMC4256774)
Supplement: b40a9025af92aca3bd22b41eccac5404_genetics.114.167320-3.pdf [file b40a9025af92aca3bd22b41eccac5404_genetics.114.167320-3.pdf]

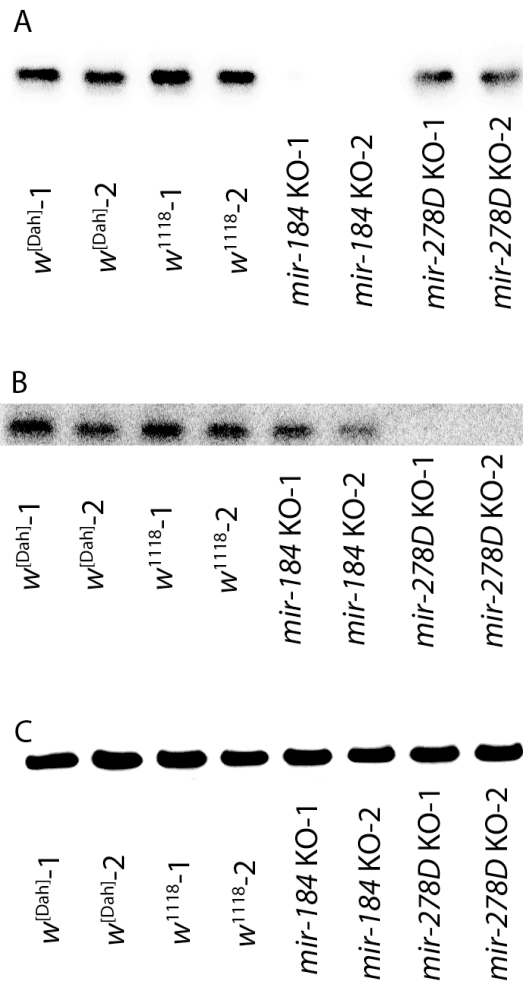

**Figure S4** Northern blot with probes for (A) *mir-184*, (B) *mir-278D*, (C) U6 control. The miRNA knock out (KO) lines showed no expression of the relevant miRNA, but no difference in expression level relative to the control lines for the other miRNA and the U6 control RNA. *w*<sup>1118</sup> is the control for the *mir-184* knock out and *w*<sup>[Dahl]</sup> is the control for the *mir-278* knock out.
