# Supplementary material
Source: PubMed Central journal article supplement (PMC4256774)
Supplement: bfc62b59c4c74a610040ffa5ccdfd794_genetics.114.167320-1.pdf [file bfc62b59c4c74a610040ffa5ccdfd794_genetics.114.167320-1.pdf]

# MicroRNAs Influence Reproductive Responses by Females to Male Sex Peptide in *Drosophila melanogaster*

Claudia Fricke<sup>\*§</sup>, Darrell Green<sup>\*^</sup>, Damian Smith<sup>\*</sup>, Tamas Dalmay<sup>\*</sup> and Tracey Chapman<sup>\*</sup>

<sup>\*</sup>School of Biological Sciences, University of East Anglia, Norwich Research Park, NR4 7TJ UK.

<sup>^</sup>Norwich Medical School, University of East Anglia, Norwich Research Park, NR4 7TJ UK.

<sup>§</sup>Institute for Evolution and Biodiversity, University of Muenster, 48149 Muenster, Germany.

## SUPPORTING INFORMATION

### File S1

(A) Description of the determination of expression levels of miRNAs chosen for investigation from a preliminary small RNA sequencing screen of responses of miRNAs to SP receipt (T. Rathjen, H. Pais, C.J. Pennington, S. Moxon, T.D. & T.C., unpublished data). (B) qRT-PCR validation methods of the small RNA sequencing results for two of the miRNAs chosen for testing in this study.

**Table S1** Normalised counts of expression of the four miRNAs chosen for investigation.

**Figure S1** Summary scheme of the direction of expression in the four selected miRNAs in response to receipt of SP.

**Figure S2** qRT-PCR validation of expression level changes in miRNAs following receipt of SP, for two of the miRNAs chosen for investigation in this study.

### File S2

Analysis of egg to adult survival of the miRNA lines.

**Figure S3** Egg-to adult survival for the miRNA-lacking females in the 24 hr intermating interval following a single mating to either a SP-lacking ( $SP^0$ ) or a control male ( $SP^+$ ).

**Figure S4** Northern blot with probes for (A) *mir-184*, (B) *mir-278D*, (C) U6.

**Figure S5** Quantitative PCR. Mean  $\pm$  SE relative expression of *mir-279* and *mir-317* in the  $w^{1118}$ , Canton-S and the *mir-279C* and *mir-317C* hypomorph lines.

## Supporting Information literature cited

## File S1

**Expression levels of miRNAs chosen for investigation – from a preliminary screen of responses of miRNAs to SP receipt (T. Rathjen, H. Pais, C.J. Pennington, S. Moxon, T.D. & T.C., unpublished data).**

**(A) Small RNA sequencing:** Fly samples were prepared and Total RNA was extracted as in (Gioti *et al.* 2012). miRNA expression data were generated from 2 replicates each (from the total of 4 described in Gioti *et al.* (2012)) for Head+Thorax (HT) and Abdomen (Abd) samples from wild type females, at 3 hr post mating to either  $SP^0$  null or control  $SP^+$  males (Liu and Kubli 2003). Total RNA was isolated, using the mirVana™ kit (Ambion), following the manufacturer's protocol for total RNA (TRNA) isolation. Quality and quantity of the isolated RNA were verified using a spectrophotometer and by gel electrophoresis. miRNA assays were performed using a service provider (BaseClear). cDNA libraries of the short RNA fractions were generated as described in Szittyá *et al.* (2008) and sequenced on the Illumina GA2 platform. All sRNA FASTQ files were first converted to FASTA format and adapter sequences were removed by trimming sequences with exact matches to the first eight bases of the 3' adapter (only this 3' adapter sequence is read). Any sequences without adapter matches or shorter than 16 nucleotides after processing were excluded. Processed sRNA reads were mapped to the *D. melanogaster* genome (release 5.9; Drysdale *et al.* 2008). This mapping was performed using PatMaN (Pruefer *et al.* 2008) allowing only perfect ungapped alignment of sRNAs to the reference genome. After pre-preprocessing, reads were mapped to the sequences of known miRNAs (miRbase v.13.0, Griffiths-Jones *et al.* 2008) using miRProf (Moxon *et al.* 2008). For each sample the number of reads assigned to each miRNA was normalized to the total number of reads mapping to at least one miRNA in that sample. Mapping of Illumina deep sequencing data against the database of known miRNAs (miRbase, v13.0) identified 75 expressed miRNAs. 28 Abd and 29 HT miRNAs showed evidence of signal:noise >1. Of these, the top 15 provided some basis for further investigation, with a final estimate of 5-10 miRNAs of interest in each body part. Expression levels for the four candidate miRNA loci chosen for investigation in this study are shown in Table S1.

**(B) Validation of small RNA sequencing by quantitative RT-PCR:** qRT-PCR was used to validate the differences in miRNA expression detected in the small RNA sequencing screen described above (C.J. Pennington & T.C. unpublished data). We used Applied Biosystems (Warrington, UK) probesets to confirm differential expression in response to SP in two of the miRNAs chosen for investigation: miR-184 and miR-279. Probes were used according to the manufacturer's instructions given in the TaqMan small RNA Assays Protocol (Applied Biosystems). 10 ng RNA was used per reaction and tests were done on all four biological replicate samples of (Gioti *et al.* 2012). Two of these replicates were subjected to the small RNA sequencing described above. Expression values for the miRNAs were determined using a standard curve method and normalized to the expression level of miR-2s. The probe target sequences used were: miR-184 (FBgn0262391, uggacggagaacugauaagggc); miR-279 (FBgn0262448, ugacuagaucacacucauuuaa); miR-2S (tgcttgactacatatggttgagggtgta).

**Table S1** Normalized counts of expression of the four miRNAs chosen for investigation here, from the preliminary screen of responses of miRNAs to SP receipt (T. Rathjen, H. Pais, S. Moxon, C.J. Pennington, T.D. & T.C., unpublished data). Shown are the expression levels of all four miRNAs in two replicates (rep 1, rep 2) of female Head+Thorax (HT) and Abdomen (Abd) samples, 3 hr after mating with  $SP^0$  null or control  $SP^+$  males. Log2 fold change values are shown ( $SP^+ / SP^0$ ) along with the direction of change in expression in response to receipt of SP. Shown in grey are the body parts in which there was no consistent pattern of differential expression in response to receipt of SP.

| <b>HT</b>  | <b>SP null 1</b> | <b>SP null 2</b> | <b>SP+ 1</b> | <b>SP+ 2</b> | <b>Fold change, rep 1 (<math>\log_2 SP^+/SP^0</math>)</b> | <b>Fold change, rep 2 (<math>\log_2 SP^+/SP^0</math>)</b> | <b>Direction of change in response to SP receipt in both replicates</b> |
|------------|------------------|------------------|--------------|--------------|-----------------------------------------------------------|-----------------------------------------------------------|-------------------------------------------------------------------------|
| miR-317    | 1,988            | 259              | 98           | 152          | -4.35                                                     | -0.77                                                     | down                                                                    |
| miR-279    | 24               | 21               | 5            | 5            | -2.36                                                     | -2.07                                                     | down                                                                    |
| miR-278    | 71               | 94               | 72           | 34           | 0.01                                                      | -1.45                                                     | -                                                                       |
| miR-184    | 95,814           | 22,076           | 11,721       | 20,001       | -3.03                                                     | -0.14                                                     | down                                                                    |
| <b>Abd</b> | <b>SP null 1</b> | <b>SP null 2</b> | <b>SP+ 1</b> | <b>SP+ 2</b> | <b>Fold change, rep 1 (<math>\log_2 SP^+/SP^0</math>)</b> | <b>Fold change, rep 2 (<math>\log_2 SP^+/SP^0</math>)</b> | <b>Direction of change in response to SP receipt in both replicates</b> |
| miR-317    | 330              | 391              | 307          | 719          | -0.10                                                     | 0.88                                                      | -                                                                       |
| miR-279    | 77               | 110              | 44           | 49           | -0.80                                                     | -1.16                                                     | down                                                                    |
| miR-278    | 34               | 79               | 140          | 104          | 2.06                                                      | 0.40                                                      | up                                                                      |
| miR-184    | 259749           | 130127           | 54091        | 200971       | -2.26                                                     | 0.63                                                      | -                                                                       |

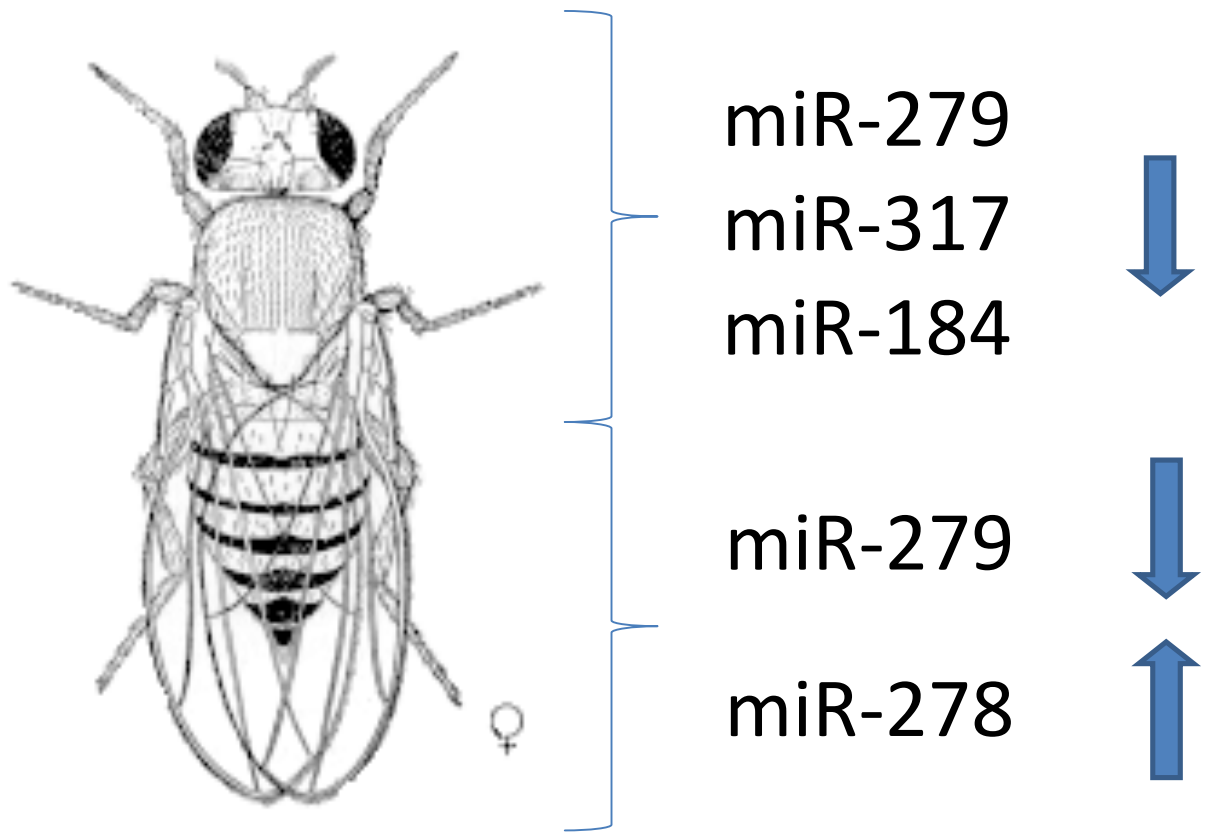

**Figure S1** Summary scheme of the direction of expression change in the four selected microRNAs in female Head+Thorax and Abdomen samples 3 hr following receipt of sex peptide from males during mating.

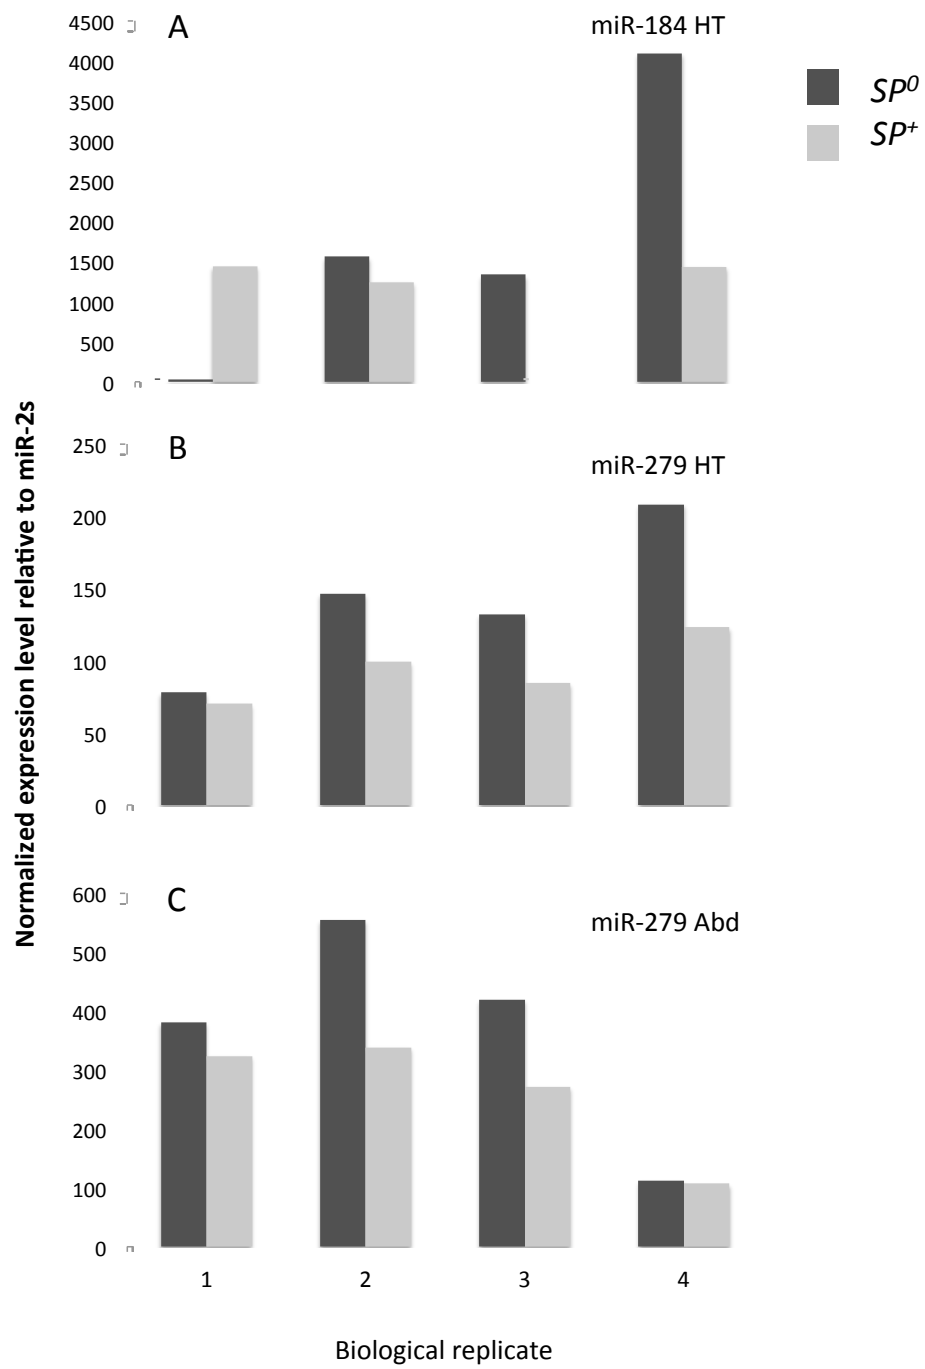

**Figure S2** qRT-PCR validation of expression level changes in microRNAs following receipt of SP, for two of the miRNA loci investigated in this study. Shown are the normalized expression levels 3hr following SP receipt, for (A) miR-184 in the HT, (B) miR-279 in the HT, and (C) miR-279 in the Abd. Normalized expression, relative to miR-2s, derived from qRT-PCR is shown for 4 replicates of females mated to  $SP^0$  or  $SP^+$  males. Individual replicate data are shown to illustrate the consistent down regulation of miR-184 and miR-279 in response to SP receipt, regardless of overall miRNA expression level variation. The small RNA sequencing described in Supporting Information 1 was conducted on 2 each of the above replicate samples (replicates 3 and 4 (HT); 2 and 4 (Abd), respectively). The qRT-PCR results validated the down regulation of miR-184 (in 3/4 replicates) and miR-279 (in 8/8 replicates) observed in the small RNA sequencing data.

## File S2

### *Analysis of egg to adult survival of the miRNA lines.*

***mir-279D and mir-317D hypomorphs*** The two Dahomey-background miRNA-hypomorph lines and their control  $w^{[Dah]}$  did not differ significantly in egg to adult survival ( $G^2 = 65.31$ ,  $F_{1,157} = 2.94$ ,  $P = 0.056$  [Dispersion parameter = 11.20]; Figure S3A).

***mir-279C and mir-317C hypomorphs*** The two  $w^{[CS]}$ -background miRNA hypomorph lines differed significantly from their control in egg to adult survival ( $G^2 = 137.82$ ,  $F_{2,117} = 19.61$ ,  $P < 0.0001$  [Dispersion parameter = 3.52]). *mir-279C* females showed the lowest egg to adult survival. Furthermore, egg-adult survival was lower in females mated to  $SP^+$  control males compared to  $SP^0$  males ( $G^2 = 25.97$ ,  $F_{1,116} = 7.39$ ,  $P = 0.008$ , interaction = ns; Figure S3B).

***mir-278D ko mir-278D ko*** females had a tendency to exhibit lower egg to adult survival than did control females ( $G^2 = 24.77$ ,  $F_{1,114} = 3.32$ ,  $P = 0.071$  [Dispersion parameter = 7.53]). This was independent of the male with which they mated ( $G^2 = 0.54$ ,  $F_{1,114} = 0.07$ ,  $P = 0.789$ , interaction = ns; Figure S3C).

***mir-184 ko mir-184 ko*** females had very low egg to adult survival (Female genotype:  $G^2 = 1140.40$ ,  $F_{1,75} = 82.31$ ,  $P < 0.0001$  [Dispersion parameter = 6.85]). Control females showed no difference in egg to adult survival according to male genotype (male x female genotype:  $G^2 = 99.76$ ,  $F_{1,74} = 14.55$ ,  $P = 0.0003$ ; male genotype:  $G^2 = 7.48$ ,  $F_{1,75} = 0.54$ ,  $P = 0.465$ ; Figure S3D).

**A**

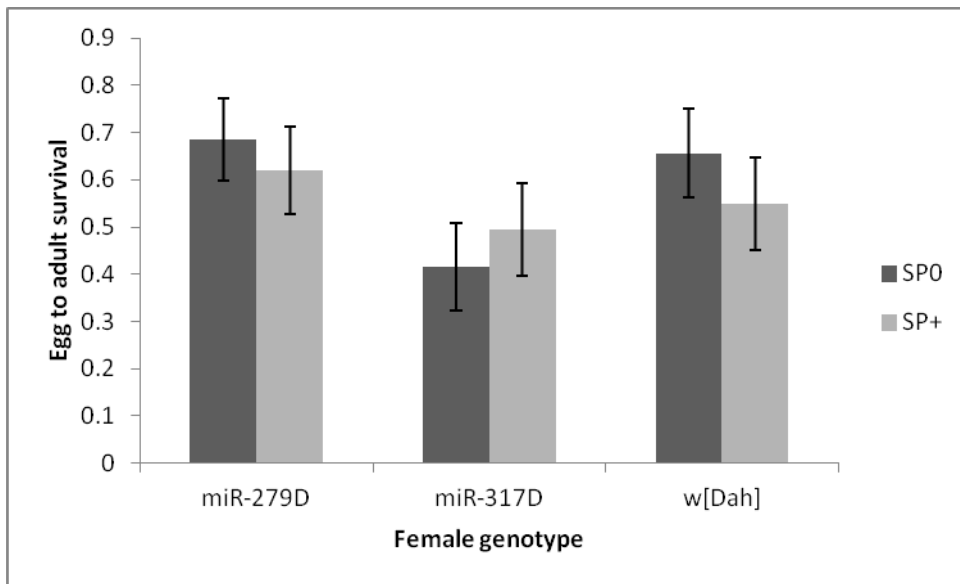

**B**

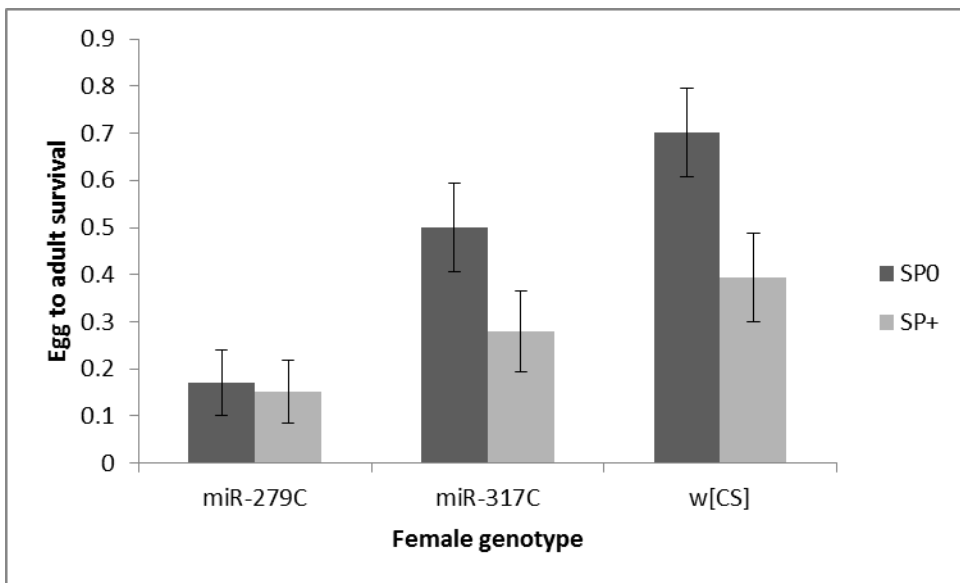



**C**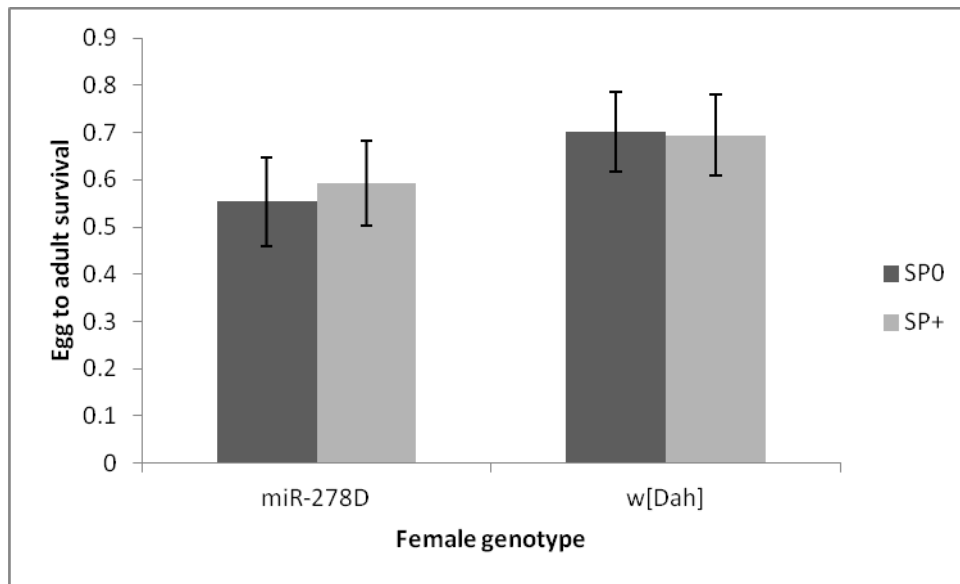**D**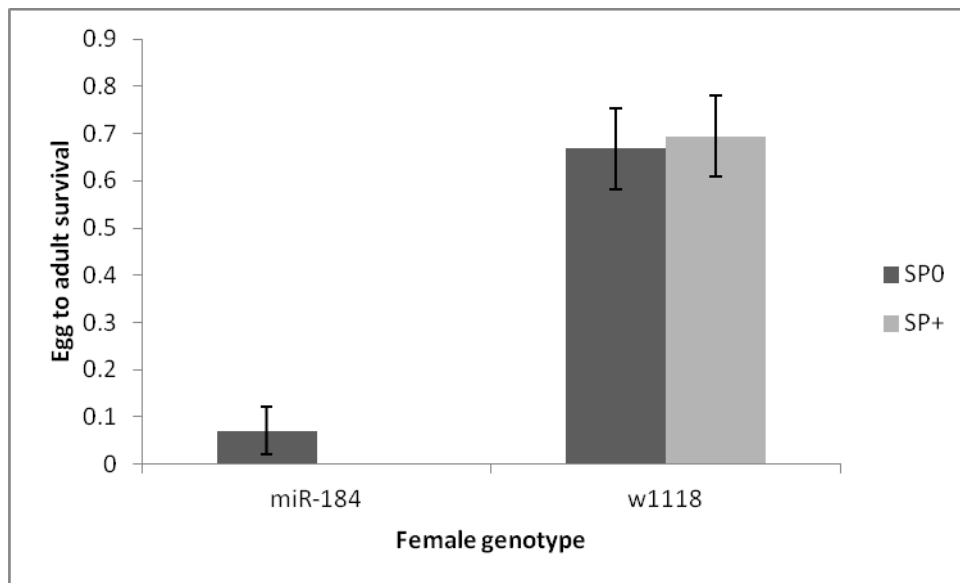

**Figure S3** Egg-to adult survival (mean  $\pm$  SE) for the miRNA-lacking females in the 24 hr intermating interval following a single mating to either a SP-lacking ( $SP^0$ ) or a control male ( $SP^+$ ): (A) hypomorphic *mir-279D* and *mir-317D* females backcrossed into the wild-type  $w^{[Dah]}$  genetic background, (B) hypomorphic *mir-279C* and *mir-317C* females backcrossed into  $w^{[CS]}$ , (C) *mir-278D* knock out females in  $w^{[Dah]}$  and (D) *mir-184* knock out females in the  $w^{1118}$  background.

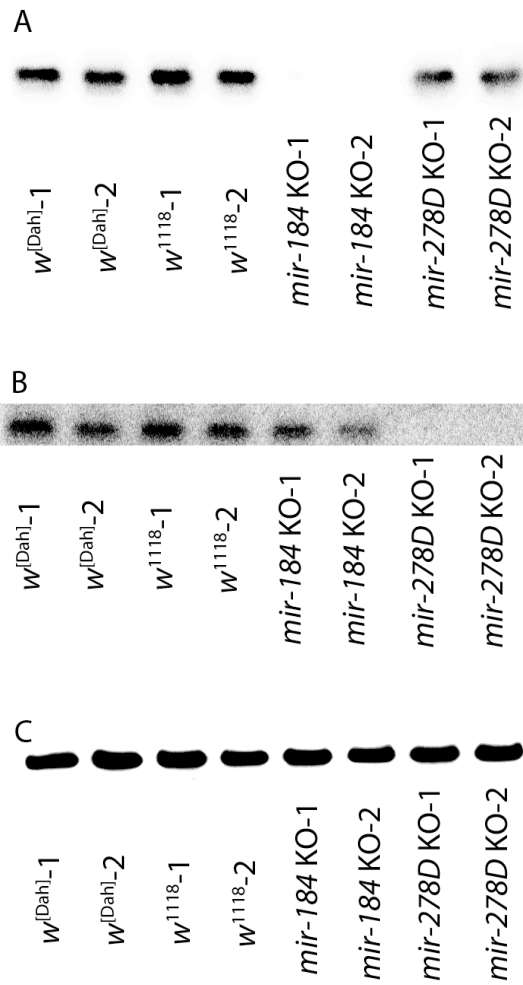

**Figure S4** Northern blot with probes for (A) *mir-184*, (B) *mir-278D*, (C) U6 control. The miRNA knock out (KO) lines showed no expression of the relevant miRNA, but no difference in expression level relative to the control lines for the other miRNA and the U6 control RNA.  $w^{1118}$  is the control for the *mir-184* knock out and  $w^{[Dahl]}$  is the control for the *mir-278* knock out.

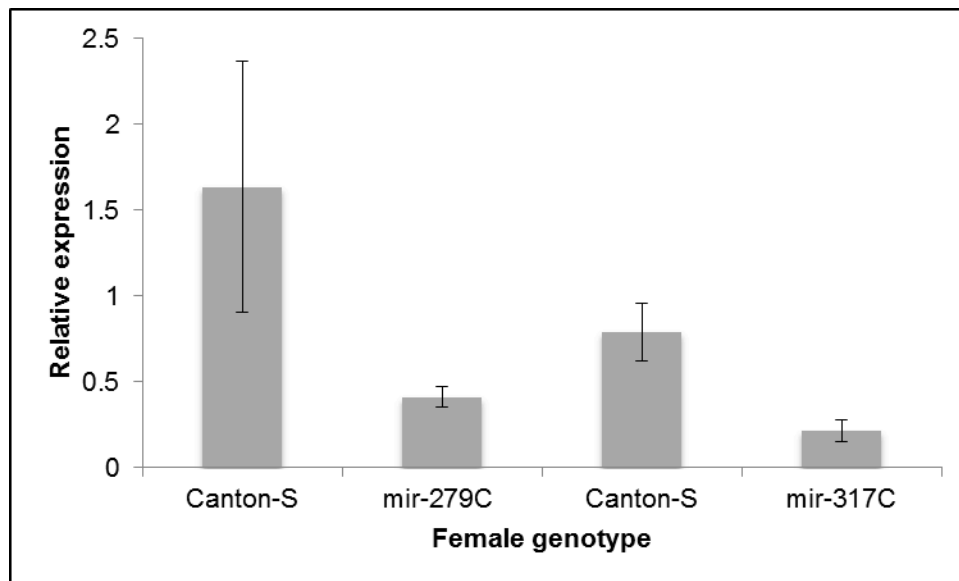

**Figure S5** Mean  $\pm$  SE relative expression of *mir-279* and *mir-317* in the control *w<sup>1118</sup>*, Canton-S and the *mir-279C* and *mir-317C* hypomorph lines. The miRNA hypomorphs had significantly lower expression than the control line. We assayed the Canton-S line twice so that the qRT-PCR run for each miRNA mutant line was conducted in parallel to the control line. The miRNA hypomorph lines had significantly lower expression than their controls (Wilcoxon rank sum,  $W = 31$ ,  $P = 0.041$  for *mir-279* and  $W = 33$ ,  $P = 0.015$  for *mir-317*). The standard curves for the miRNA qPCR probes ran from 0.5-0.00016 ng total RNA with a 1:5 serial dilution and had the following  $R^2$  and slope values: *miR-279*:  $R^2 = 0.9866$ , slope = -2.6378; *mir-317*:  $R^2 = 0.9828$ , slope = -2.4508; *mir-2S*:  $R^2 = 0.9942$ , slope = -3.2352.

## Literature Cited

- Drysdale, R. *et al.*, 2008 FlyBase - A database for the Drosophila research community. *Methods Mol. Biol.* 420: 45-59.
- Gioti, A., S. Wigby, B. Wertheim, E. Schuster, P. Martinez, C. J. Pennington, L. Partridge, and T. Chapman. 2012 Sex peptide of *Drosophila melanogaster* males is a global regulator of reproductive processes in females. *Proc. Roy. Soc. B* 279: 4423-4432.
- Griffiths-Jones, S., H. K. Saini, S. van Dongen, and A. J. Enright. 2008 miRBase: tools for microRNA genomics. *Nucl. Acids Res.* 36: D154-D158.
- Liu, H. and E. Kubli. 2003 Sex-peptide is the molecular basis of the sperm effect in *Drosophila melanogaster*. *Proc. Natl. Acad. Sci. USA* 100: 9929-9933.
- Moxon, S., F. Schwach, T. Dalmay, D. MacLean, D. J. Studholme, and V. Moulton. 2008 A toolkit for analysing large-scale plant small RNA datasets. *Bioinf.* 24: 2252-2253.
- Pruefer, K., U. Stenzel, M. Dannemann, G. R.E., M. Lachmann, and J. Kelso. 2008 PatMaN: rapid alignment of short sequences to large databases. *Bioinf.* 24: 1530-1531.
- Szittyá, G., S. Moxon, D. M. Santos, R. Jing, M. P. S. Fevereiro, V. Moulton, and T. Dalmay. 2008 High-throughput sequencing of *Medicago truncatula* short RNAs identifies eight new miRNA families. *BMC Genomics* 9: 593.
