# Supplementary material
Source: PubMed Central journal article supplement (PMC4256774)
Supplement: c290cf0859ad4e75889f57c7b127b7fc_genetics.114.167320-5.pdf [file c290cf0859ad4e75889f57c7b127b7fc_genetics.114.167320-5.pdf]

**Table S1** Normalized counts of expression of the four miRNAs chosen for investigation here, from the preliminary screen of responses of miRNAs to SP receipt (T. Rathjen, H. Pais, S. Moxon, C.J. Pennington, T.D. & T.C., unpublished data). Shown are the expression levels of all four miRNAs in two replicates (rep 1, rep 2) of female Head+Thorax (HT) and Abdomen (Abd) samples, 3 hr after mating with  $SP^0$  null or control  $SP^+$  males. Log2 fold change values are shown ( $SP^+ / SP^0$ ) along with the direction of change in expression in response to receipt of SP. Shown in grey are the body parts in which there was no consistent pattern of differential expression in response to receipt of SP.

| <b>HT</b>  | <b>SP null 1</b> | <b>SP null 2</b> | <b>SP+ 1</b> | <b>SP+ 2</b> | <b>Fold change, rep 1 (<math>\log_2 SP^+/SP^0</math>)</b> | <b>Fold change, rep 2 (<math>\log_2 SP^+/SP^0</math>)</b> | <b>Direction of change in response to SP receipt in both replicates</b> |
|------------|------------------|------------------|--------------|--------------|-----------------------------------------------------------|-----------------------------------------------------------|-------------------------------------------------------------------------|
| miR-317    | 1,988            | 259              | 98           | 152          | -4.35                                                     | -0.77                                                     | down                                                                    |
| miR-279    | 24               | 21               | 5            | 5            | -2.36                                                     | -2.07                                                     | down                                                                    |
| miR-278    | 71               | 94               | 72           | 34           | 0.01                                                      | -1.45                                                     | -                                                                       |
| miR-184    | 95,814           | 22,076           | 11,721       | 20,001       | -3.03                                                     | -0.14                                                     | down                                                                    |
| <b>Abd</b> | <b>SP null 1</b> | <b>SP null 2</b> | <b>SP+ 1</b> | <b>SP+ 2</b> | <b>Fold change, rep 1 (<math>\log_2 SP^+/SP^0</math>)</b> | <b>Fold change, rep 2 (<math>\log_2 SP^+/SP^0</math>)</b> | <b>Direction of change in response to SP receipt in both replicates</b> |
| miR-317    | 330              | 391              | 307          | 719          | -0.10                                                     | 0.88                                                      | -                                                                       |
| miR-279    | 77               | 110              | 44           | 49           | -0.80                                                     | -1.16                                                     | down                                                                    |
| miR-278    | 34               | 79               | 140          | 104          | 2.06                                                      | 0.40                                                      | up                                                                      |
| miR-184    | 259749           | 130127           | 54091        | 200971       | -2.26                                                     | 0.63                                                      | -                                                                       |
